# Supplementary material for: Risk Factors Related to Venous Thromboembolism at Three-months Following Joint Replacement in Chinese Population
Source: Research Square preprint supplement (doi:10.21203/rs.3.rs-2812839/v1), 2023-04-19
Supplement: Supplementary file 1 [file cbc424432690a0ac9a702976.xlsx]

## Sheet: Sheet1
Risk Factors	DVT-3m Positive	DVT-3m Negative	OR	95%CI	p value
Number of patients	185	1559	-	-	-
Gender
Female	159 (85.9%)	1112 (71.3%)	1.828	1.164-2.873	0.009
Male*	26 (14.1%)	447 (28.7%)	-	-	-
Age, years			1.023	1.006-1.041	0.007
Mean ± SD	70.77 ± 9.31	64.68 ± 12.70
Previous thrombotic disease
Yes	42 (22.7%)	193 (12.4%)	1.592	1.044-2.427	0.031
No*	143 (77.3%)	1366 (87.6%)	-	-	-
OT-season
Spring*	59 (31.9%)	622 (39.9%)	-	-	-
Summer	46 (24.9%)	369 (23.7%)	1.343	0.864-2.088	0.191
Autumn	63 (34.1%)	418 (26.8%)	1.874	1.241-2.829	0.003
Winter	17 (9.2%)	150 (9.6%)	1.057	0.578-1.933	0.857
VTE-postsurg
Yes	104 (56.2%)	198 (12.7%)	7.633	5.410-10.769	< 0.001
No*	81 (43.8%)	1361 (87.3%)	-	-	-
*Reference group
